# Supplementary material for: Dual Deletion of Keap1 and Rbpjκ Genes in Liver Leads to Hepatomegaly and Hypercholesterolemia
Source: MDPI journal article supplement (doi:10.3390/ijms25094712), 2024-04-26
Supplement: s1 [file s1]

## Supplementary Materials

### Dual deletion of *Keap1* and *Rbpjk* genes in liver leads to hepatomegaly and hypercholesterolemia

Nobunao Wakabayashi<sup>1</sup>, Yoko Yagishita<sup>1,2</sup>, Tanvi Joshi<sup>1</sup> and Thomas W. Kensler<sup>1,\*</sup>

<sup>1</sup> Translational Research Program, Fred Hutchinson Cancer Center, Seattle, WA 98109, USA.  
nwakabay@fredhutch.org (N.W.); yyagishi@fredhutch.org or yy3328@cumc.columbia.edu (Y.Y.);  
tjoshi@fredhutch.org (T.J.); tkensler@fredhutch.org (T.W.K.)

<sup>2</sup> Division of Endocrinology, Columbia University, New York, NY 10032, USA

\* Correspondence: tkensler@fredhutch.org

[ number ] corresponds to references number in the article.

**Table S1.** Primers for mouse genotyping

| <i>Genotyping for Rbpjk<sup>F/F</sup> background mouse</i> |                              |
|------------------------------------------------------------|------------------------------|
| Primers                                                    | Sequence (5' - 3')           |
| Rbpjk-Int6.2                                               | CCTTTCTTTGTGCGTGCCTCC        |
| Rbpjk-Ex7.2                                                | TGACAGTCTGCCCGTAATGG         |
| Rbpjk-Int8.2                                               | CCTAGAACAGGCTGCCTGATCACCTTCC |

  

| <i>Genotyping for Keap1<sup>F/F</sup> background mouse</i> [66] |                                |
|-----------------------------------------------------------------|--------------------------------|
| 5-cko 4int1                                                     | GCACATCCTTCATCTCTCCGCACTGGGGAG |
| 3-Kp1-4Ex                                                       | CCTCCGTGTCAACATTGGCGCGACTAG    |
| R260-EGFP                                                       | GACTTGAAGAAGTCGTGCTGCTTCATGTG  |

  

| <i>Genotyping for Nrf2<sup>F/F</sup> background mouse</i> [67] |                                  |
|----------------------------------------------------------------|----------------------------------|
| N3                                                             | TGAGAGCTTCCCAGACTCACTT           |
| mNrf2Ex-V-32                                                   | CTGGGCTGGGAACAGCGGTAGTATCAGCCAGC |

  

| <i>Genotyping for Cre background mouse</i> [22] |                      |
|-------------------------------------------------|----------------------|
| Cre1                                            | ACGTTACCGGCATCAACGT  |
| Cre2                                            | CTGCATTACCGGTCGATGCA |

**Table S2.** PCR programs for mouse genotyping

| <i>Keap1<sup>F/F</sup> background mouse</i> [66]           |         |        |                                |
|------------------------------------------------------------|---------|--------|--------------------------------|
| Step #                                                     | Temp °C | Time   | Note                           |
| 1                                                          | 95      | 1 min  | -                              |
| 2                                                          | 95      | 30 sec | -                              |
| 3                                                          | 68.5    | 30 sec | -                              |
| 4                                                          | 72      | 30 sec | repeat steps 2-4 for 35 cycles |
| 5                                                          | 4       | -      | hold                           |
| Product; Flox : ~350 bp, Disrupted : ~550 bp, Wt : ~250 bp |         |        |                                |

| <i>Rbpj<sup>F/F</sup> background mouse</i>                 |         |        |                                |
|------------------------------------------------------------|---------|--------|--------------------------------|
| Step #                                                     | Temp °C | Time   | Note                           |
| 1                                                          | 95      | 1 min  | -                              |
| 2                                                          | 95      | 30 sec | -                              |
| 3                                                          | 68.5    | 30 sec | -                              |
| 4                                                          | 72      | 30 sec | repeat steps 2-4 for 35 cycles |
| 5                                                          | 72      | 1 min  | -                              |
| 6                                                          | 4       | -      | hold                           |
| Product; Flox : ~515 bp, Disrupted : ~300 bp, Wt : ~415 bp |         |        |                                |

**Table S3.** Primers for deletion check genotyping of *Nrf2<sup>F/F</sup>* mouse and its PCR program

| <i>Genotyping for Nrf2<sup>F/F</sup> background mouse</i> [63] |                        |
|----------------------------------------------------------------|------------------------|
| N1                                                             | TCTTAGGCACCATTTGGGAGAG |
| N2                                                             | TACAGCAGGCATACCATTGTGG |
| N3                                                             | TGAGAGCTTCCCAGACTCACTT |

| <i>Nrf2<sup>F/F</sup> background mouse</i>   |         |        |                                |
|----------------------------------------------|---------|--------|--------------------------------|
| Step #                                       | Temp °C | Time   | Note                           |
| 1                                            | 95      | 1 min  | -                              |
| 2                                            | 95      | 30 sec | -                              |
| 3                                            | 68.7    | 30 sec | -                              |
| 4                                            | 72      | 30 sec | repeat steps 2-4 for 35 cycles |
| 5                                            | 4       | -      | hold                           |
| Product; Flox : ~750 bp, Disrupted : ~405 bp |         |        |                                |

**Table S4.** Primers for the real-time PCR analyses.

| Gene            | Forward                    | Reverse                  |
|-----------------|----------------------------|--------------------------|
| <i>Srebp1c</i>  | GGAGCCATGGATTGCACATT       | GGCCCGGGAAGTCACTGT       |
| <i>Acc1</i>     | ATGGGCGGAATGGTCTCTTTC      | TGGGGACCTTGTCTTCATCAT    |
| <i>Fasn</i>     | GGAGGTGGTGATAGCCGGTAT      | TGGGTAATCCATAGAGCCCAG    |
| <i>Scd1</i>     | TTCTTGCGATACTCTGGTGC       | CGGGATTGAATGTTCTTGTCGT   |
| <i>Srebp2</i>   | CGAGCAACGGGACCATTCT        | CCCCATGACTAAGTCCTTCAACT  |
| <i>Hmgcs1</i>   | GCAGTCTTCAATGCCGTGAA       | GCAATGTCTCCTGCAACTACCA   |
| <i>Hmgcr</i>    | TTGGTCCTTGTTACGCTCAT       | TTCGTCCAGACCCAAGGAAAC    |
| <i>Mvd</i>      | ATGGCCTCAGAAAAGCCTCAG      | TGGTCGTTTTTAGCTGGTCCT    |
| <i>Ldlr</i>     | CCAATCGACTACGGGTTC         | TCACACCAGTTCACCCCTCT     |
| <i>Nr0b2</i>    | CAGGTCGTCCGACTATTCTGT      | AGGCTACTGTCTTGGCTAGGA    |
| <i>Cyp7A1</i>   | AGCAACTAAACAACCTGCCAGTACTA | GTCCGGATATTCAAGGATGCA    |
| <i>Abcb11</i>   | CAGGGAGGCCAAAGGTGAGC       | ATGGTGGCAGGGAATGAAAAGTAG |
| <i>18S rRNA</i> | CTCAACACGGGAAACCTCAC       | CGCTCCACCAACTAAGAACG     |

[67,68] and <https://pga.mgh.harvard.edu/primerbank/>

**Table S5.** Antibodies used in this research.

| <b>Target Protein</b>               | <b>Provider</b>            | <b>Dilution</b> |
|-------------------------------------|----------------------------|-----------------|
| Nrf2                                | Invitrogen PA5-27882       | 2,000           |
| Keap1                               | Original                   | 3,000           |
| Rbpjk                               | Santa Cruz Bio sc-28713    | 500             |
| NR0B2                               | Invitrogen PA5-76632       | 500             |
| LaminB1                             | Proteintech 12987-1-AP     | 5,000           |
| Nqo1                                | Abcam ab2346               | 500             |
| GstA1-5                             | Invitrogen PA5-79335       | 2,000           |
| Mvd                                 | Proteintech 15331-1-AP     | 1,000           |
| SREBPF2                             | Proteintech 28212-1-AP     | 2,000           |
| HMGCS1                              | Cell Signaling Tech Q01581 | 1,000           |
| CYP7A1                              | Invitrogen PA5-100892      | 500             |
| Rabbit anti-Goat IgG (H+L)-HRP      | Invitrogen 31402           | 10,000          |
| Goat Anti-Rabbit<br>IgG (H + L)-HRP | BIO RAD 1706515            | 3,000           |

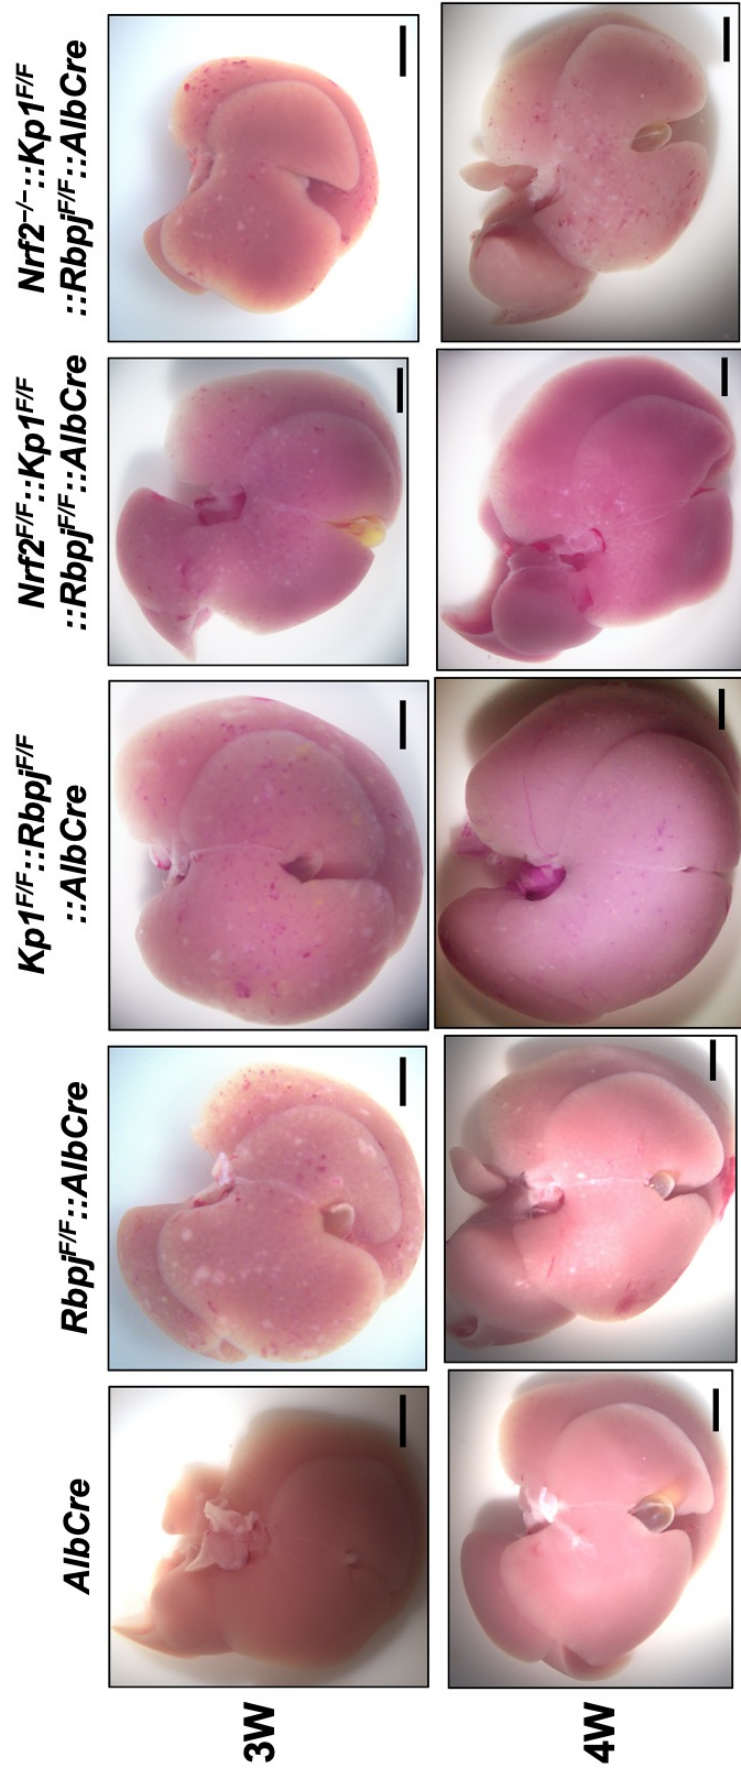

**Figure S1.** Changes in liver morphology among the genotypes. Representative livers from 3W and 4W old males. The scale bar = 5 mm.



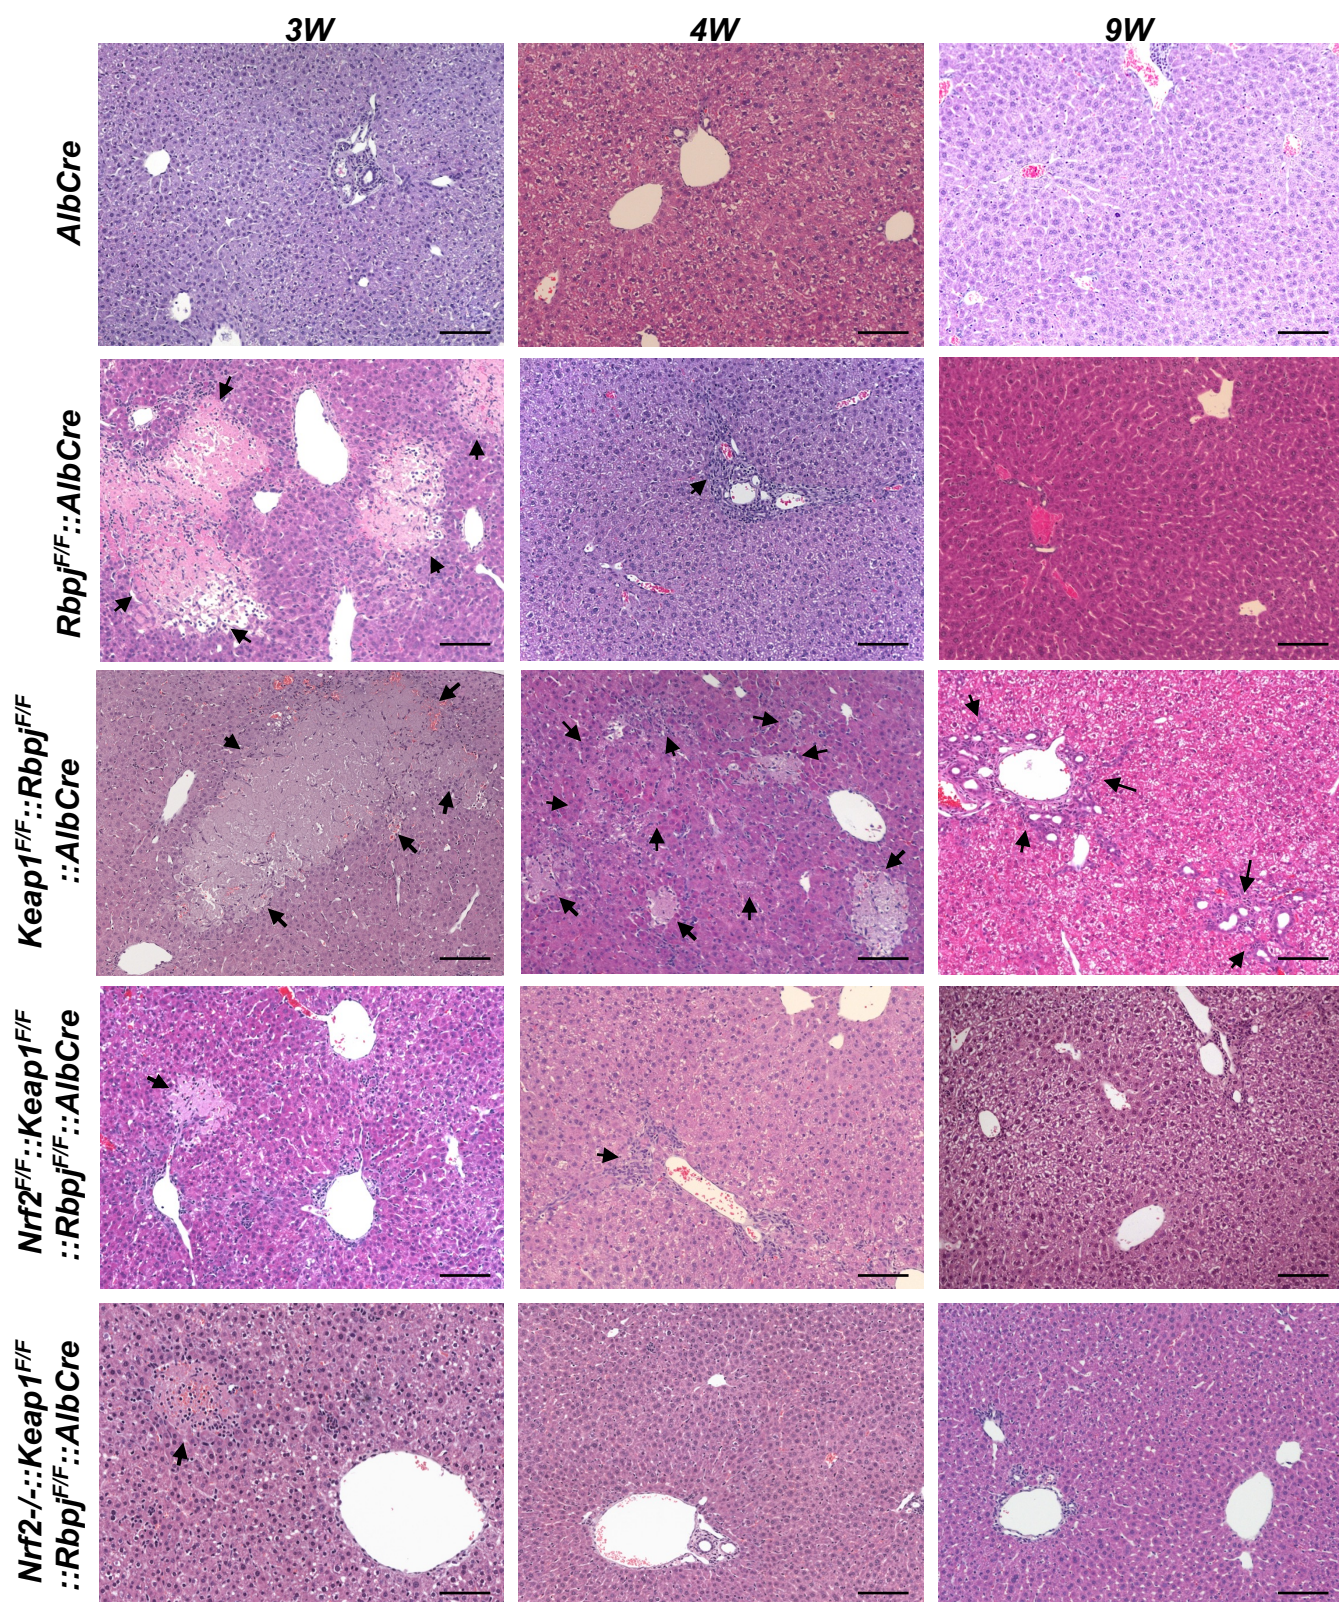

**Figure S2.** Changes in liver morphology among the genotypes. H&E stained sections from the central lobe of each genotype mouse at 3W, 4W and 9W of age. Arrows indicate the degeneration and damage produced by cholestasis. The scale bar = 100  $\mu$ m.



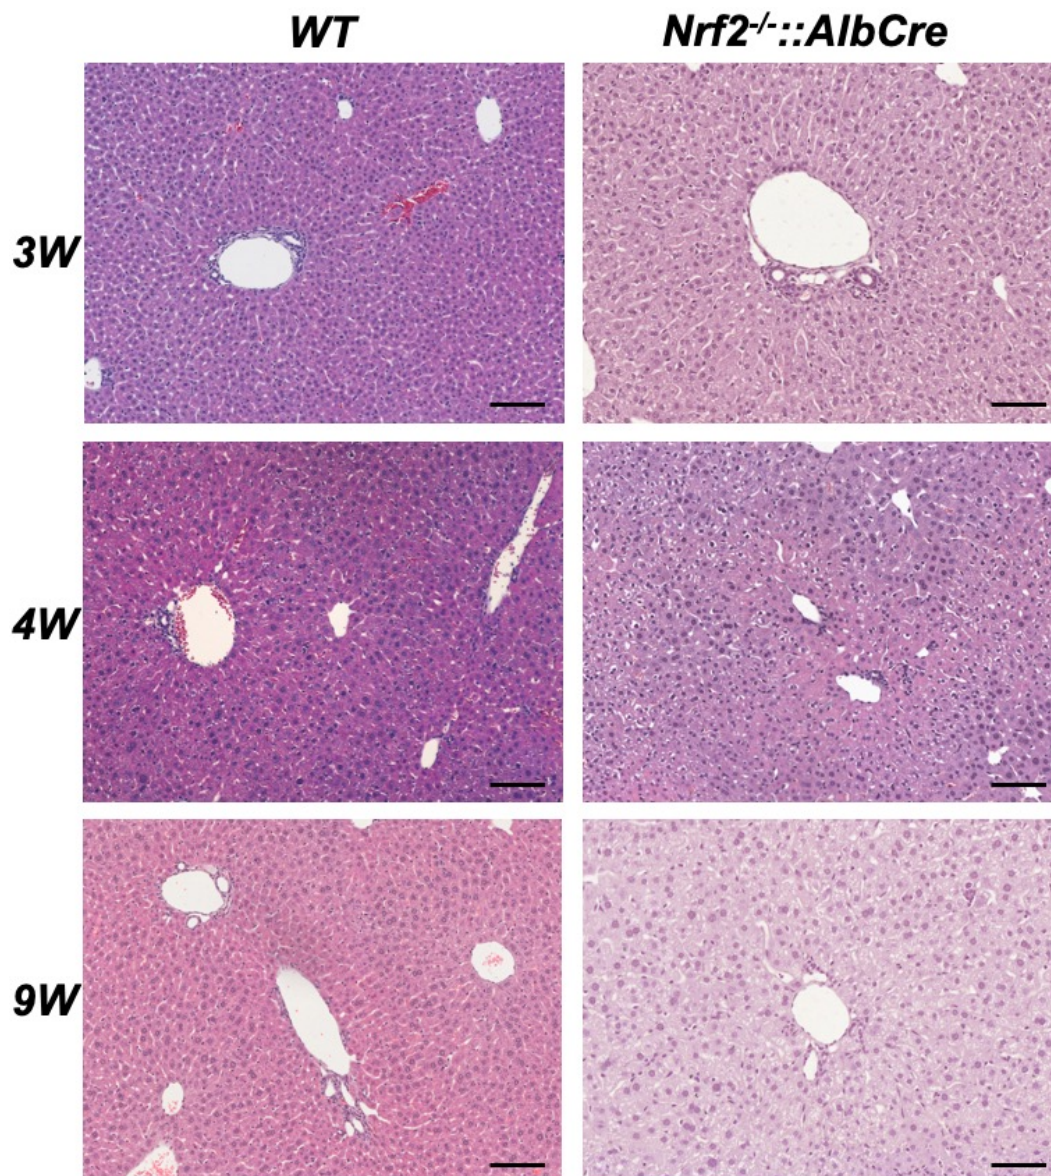

**Figure S3. H&E stained sections from the central lobe of control genotype mice at 3W, 4W and 9W of age. The scale bar = 100  $\mu$ m.**

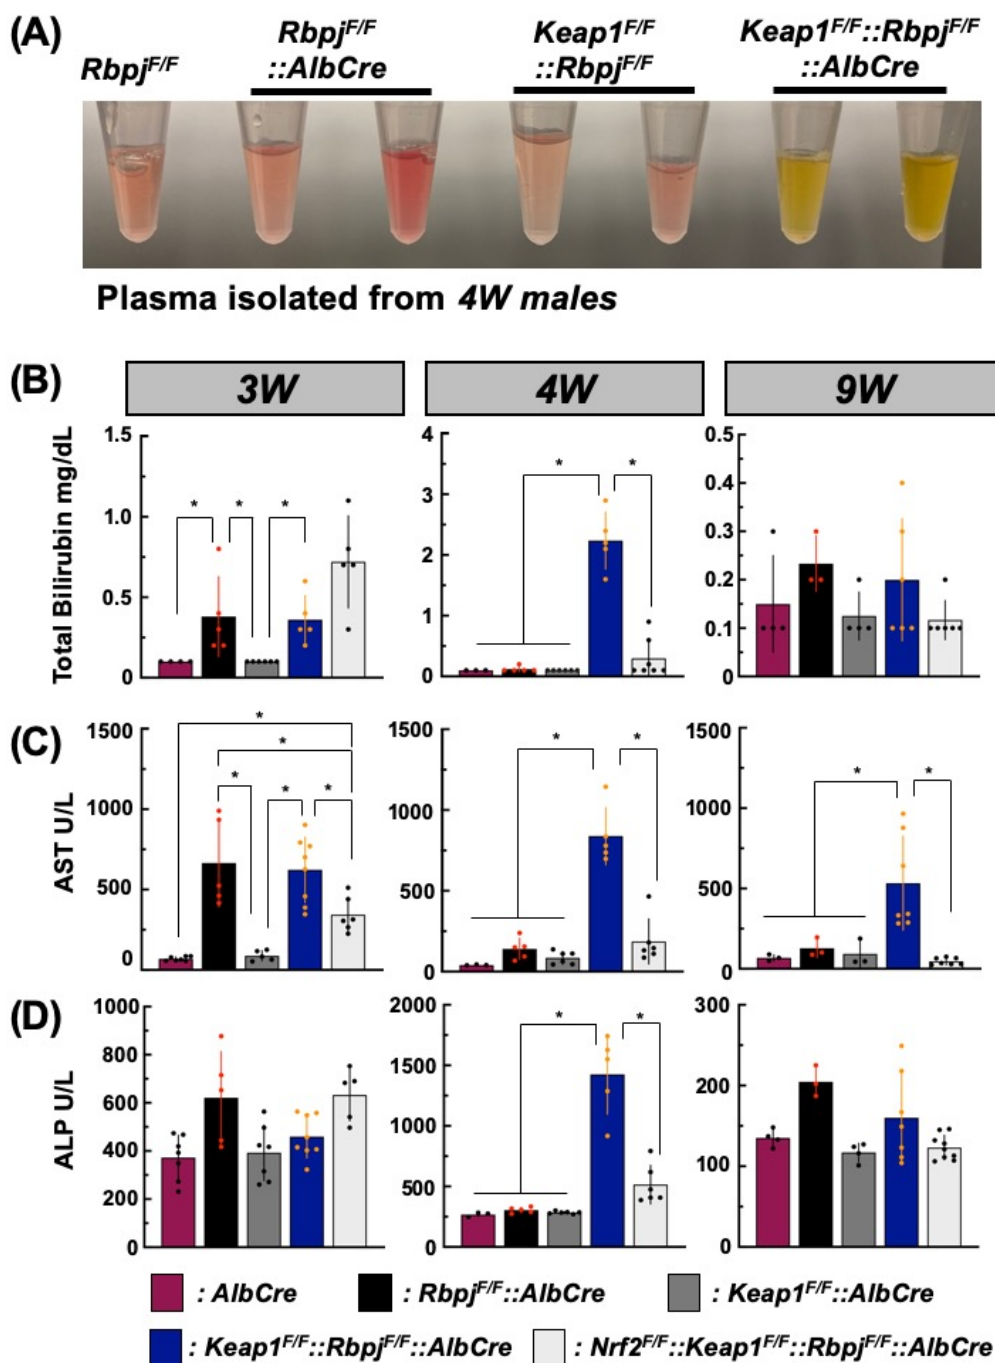

Figure S4. Features of plasma color (4W) and plasma biochemical analyses (3W, 4W and 9W of age) in the relevant mouse genotypes. N=3-9 \*  $p < 0.05$ , by Tukey's.

## Oil Red O staining

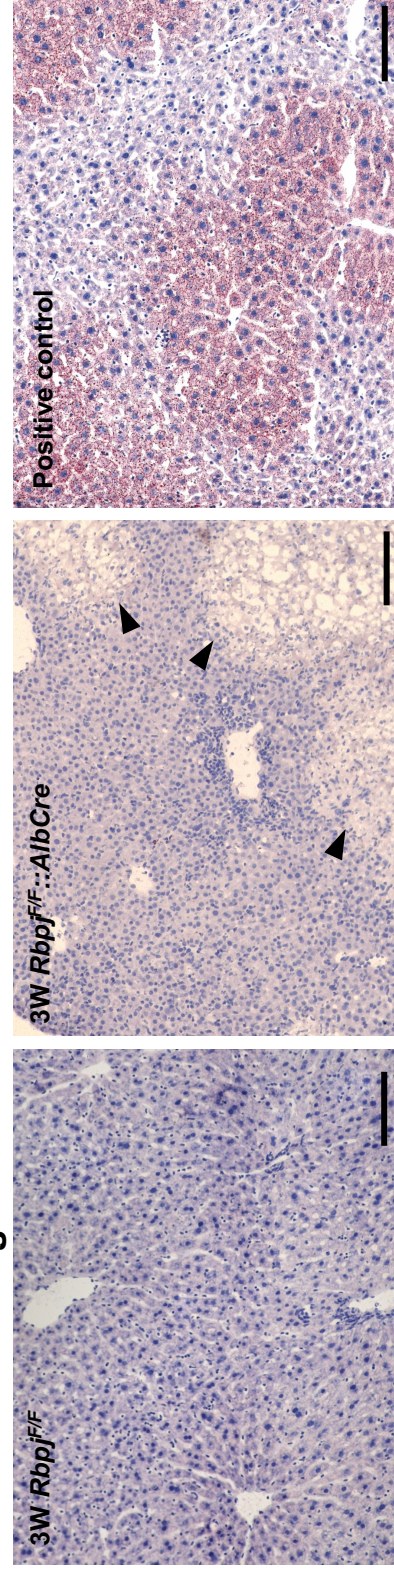

**Figure S5.** The degenerated foci observed in *Rbpj<sup>F/F</sup>::AlbCre* liver were confirmed by oil red O staining. Arrow heads indicate degenerated regions in the liver. The scale bar = 100  $\mu$ m.



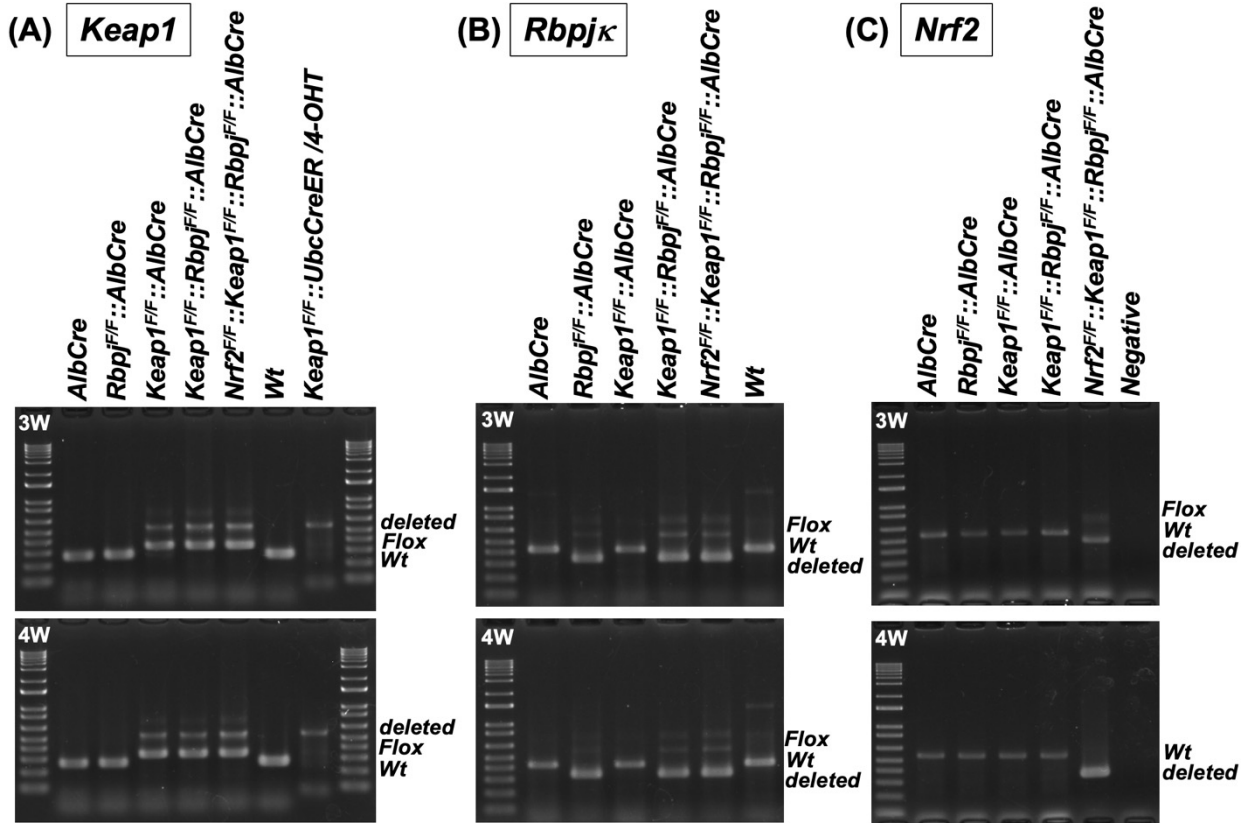

**Figure S6. Representative profiles of gene allelic conversions by *AlbCre* expression.** *Keap1*, *Rbpj $\kappa$*  and *Nrf2* allelic change are depicted in (A), (B) and (C), respectively. The top and bottom panels show PCR results from 3W and 4W mouse liver genomic DNA as template, respectively. The PCR conditions for detection of *Keap1* and *Nrf2* conversion have been described previously[63], [66]. For *Rbpj $\kappa$* , PCR conditions and its primers are shown in Table S1, S2 and Figure S4.

***Rbpjk* gene Locus**

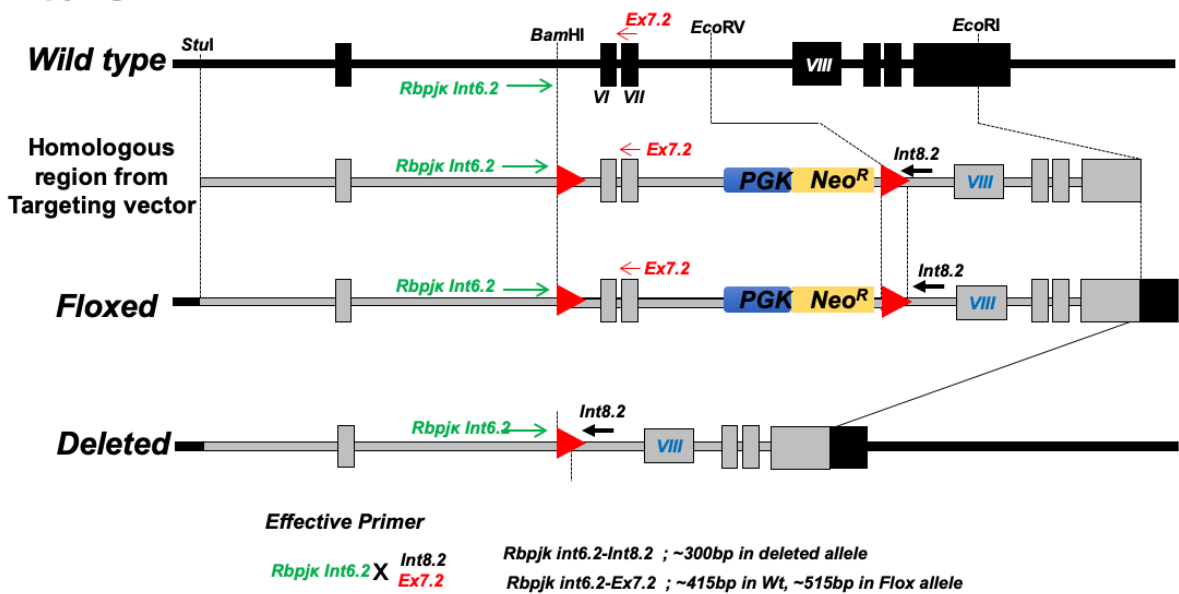

**Figure S7. Mouse *Rbpjk* and its flox mutant gene structure and primer positions for genotyping.** Positions for each primer for *Int6.2*, *Int8.2* and *Ex 7.2* are indicated by green, black and red arrows, respectively. Red triangles indicate *LoxP* elements. The structures provided arise from the original paper[65].

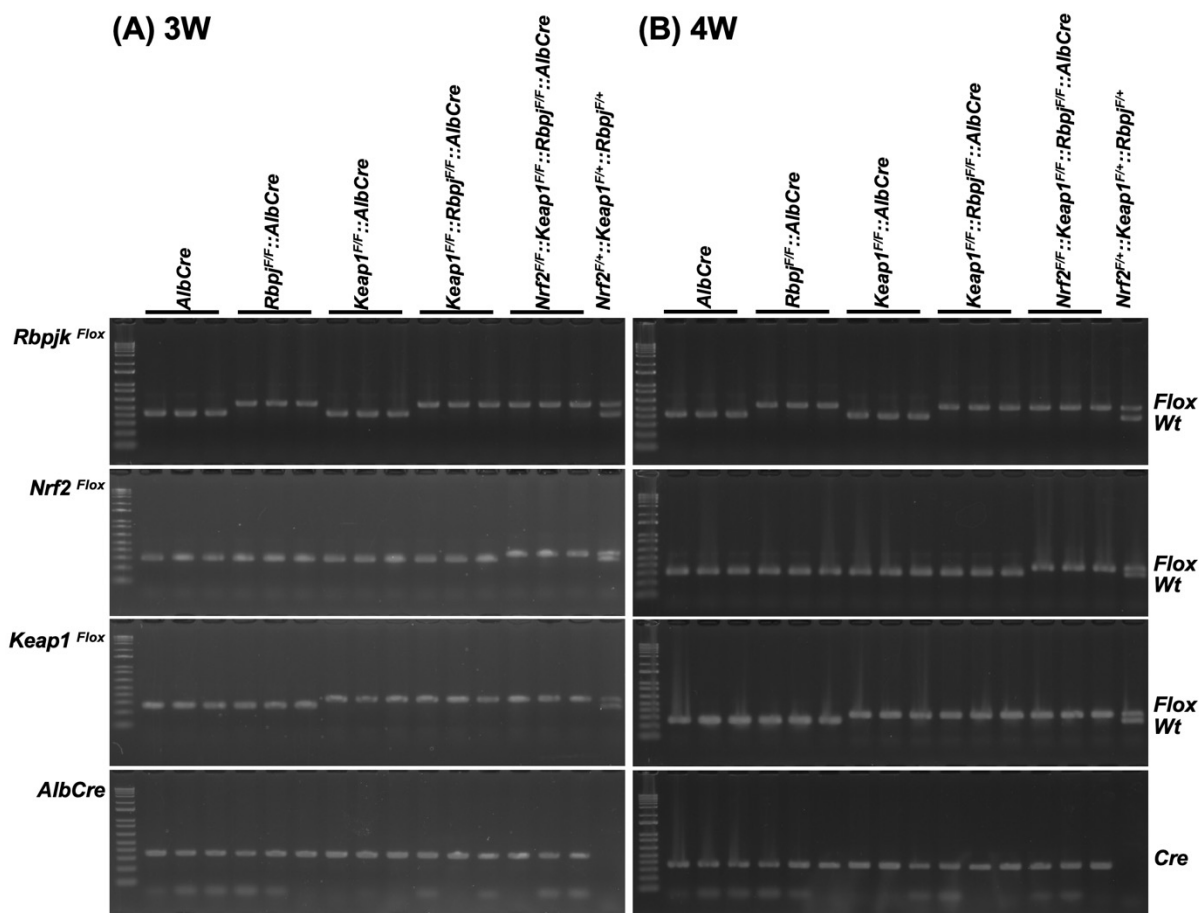

**Figure S8. Representative results of confirmatory genotyping.** DNA isolated from tail snips of each heterozygote of *Nrf2<sup>F/+</sup>::Keap1<sup>F/+</sup>::Rbpjk<sup>F/+</sup>* and *Rbpjk<sup>Flox</sup>* (top), *Nrf2<sup>Flox</sup>* (second), *Keap1<sup>Flox</sup>* (third), and *Albumin Cre* (bottom) was used for genotyping. Analyses from 3W and 4W old mice are presented in panels (A) and (B), respectively.



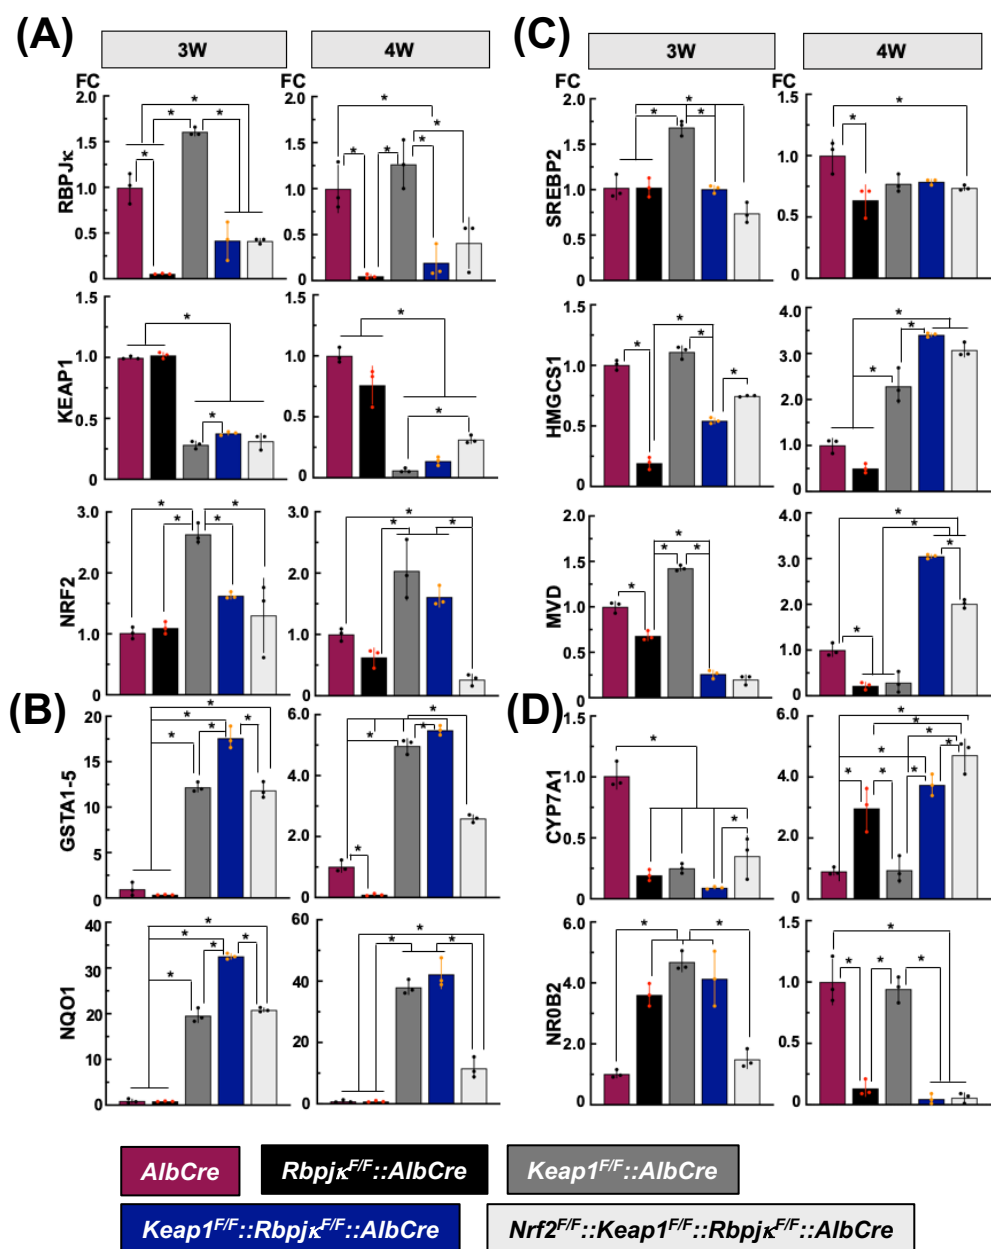

**Figure S9.** Immunoblotting analyses of putative ARE-regulated (NRF2) gene products in metabolic pathways affecting cholesterol-bile acid flux in 3W and 4W old mice. Liver extracts from 3 individual mice for each genotype were examined; quantification was performed by normalizing with LMNB1 expression. Deletion target gene products (A), representative NRF2 target genes (B), cholesterol synthesis related gene products (C) and bile acid pathway related gene products (D) are presented. The Y axis indicates the level of fold change (FC) where gene expression in *AlbCre* mice was set as 1. N=3. \*  $p < 0.05$  by Tukey's.
